# Supplementary material
Source: publisher figshare collection journal article supplement (https://springernature.figshare.com/ndownloader/files/13032836)
Supplement: Supplementary file [file 13032836]

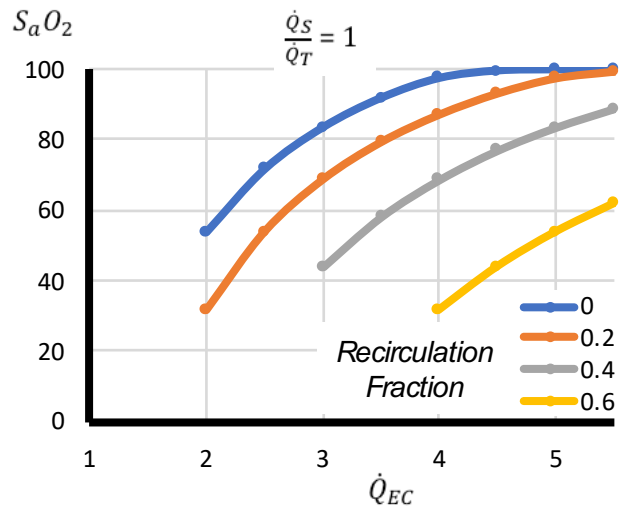

**Supplementary Figure 2. Effect of recirculation at high  $\frac{\dot{Q}_S}{\dot{Q}_T}$**

Results for  $\frac{\dot{Q}_S}{\dot{Q}_T} = 1$ . With increasing recirculation there is a large fall in  $S_a O_2$ , and the scenario becomes untenable unless  $\dot{Q}_{EC}$  is high.
